# Supplementary material
Source: Springer Nature journal article supplement (https://www.springermedizin.de/resource/supplementary/12974_2013_932_MOESM4_ESM.pdf/9600602)

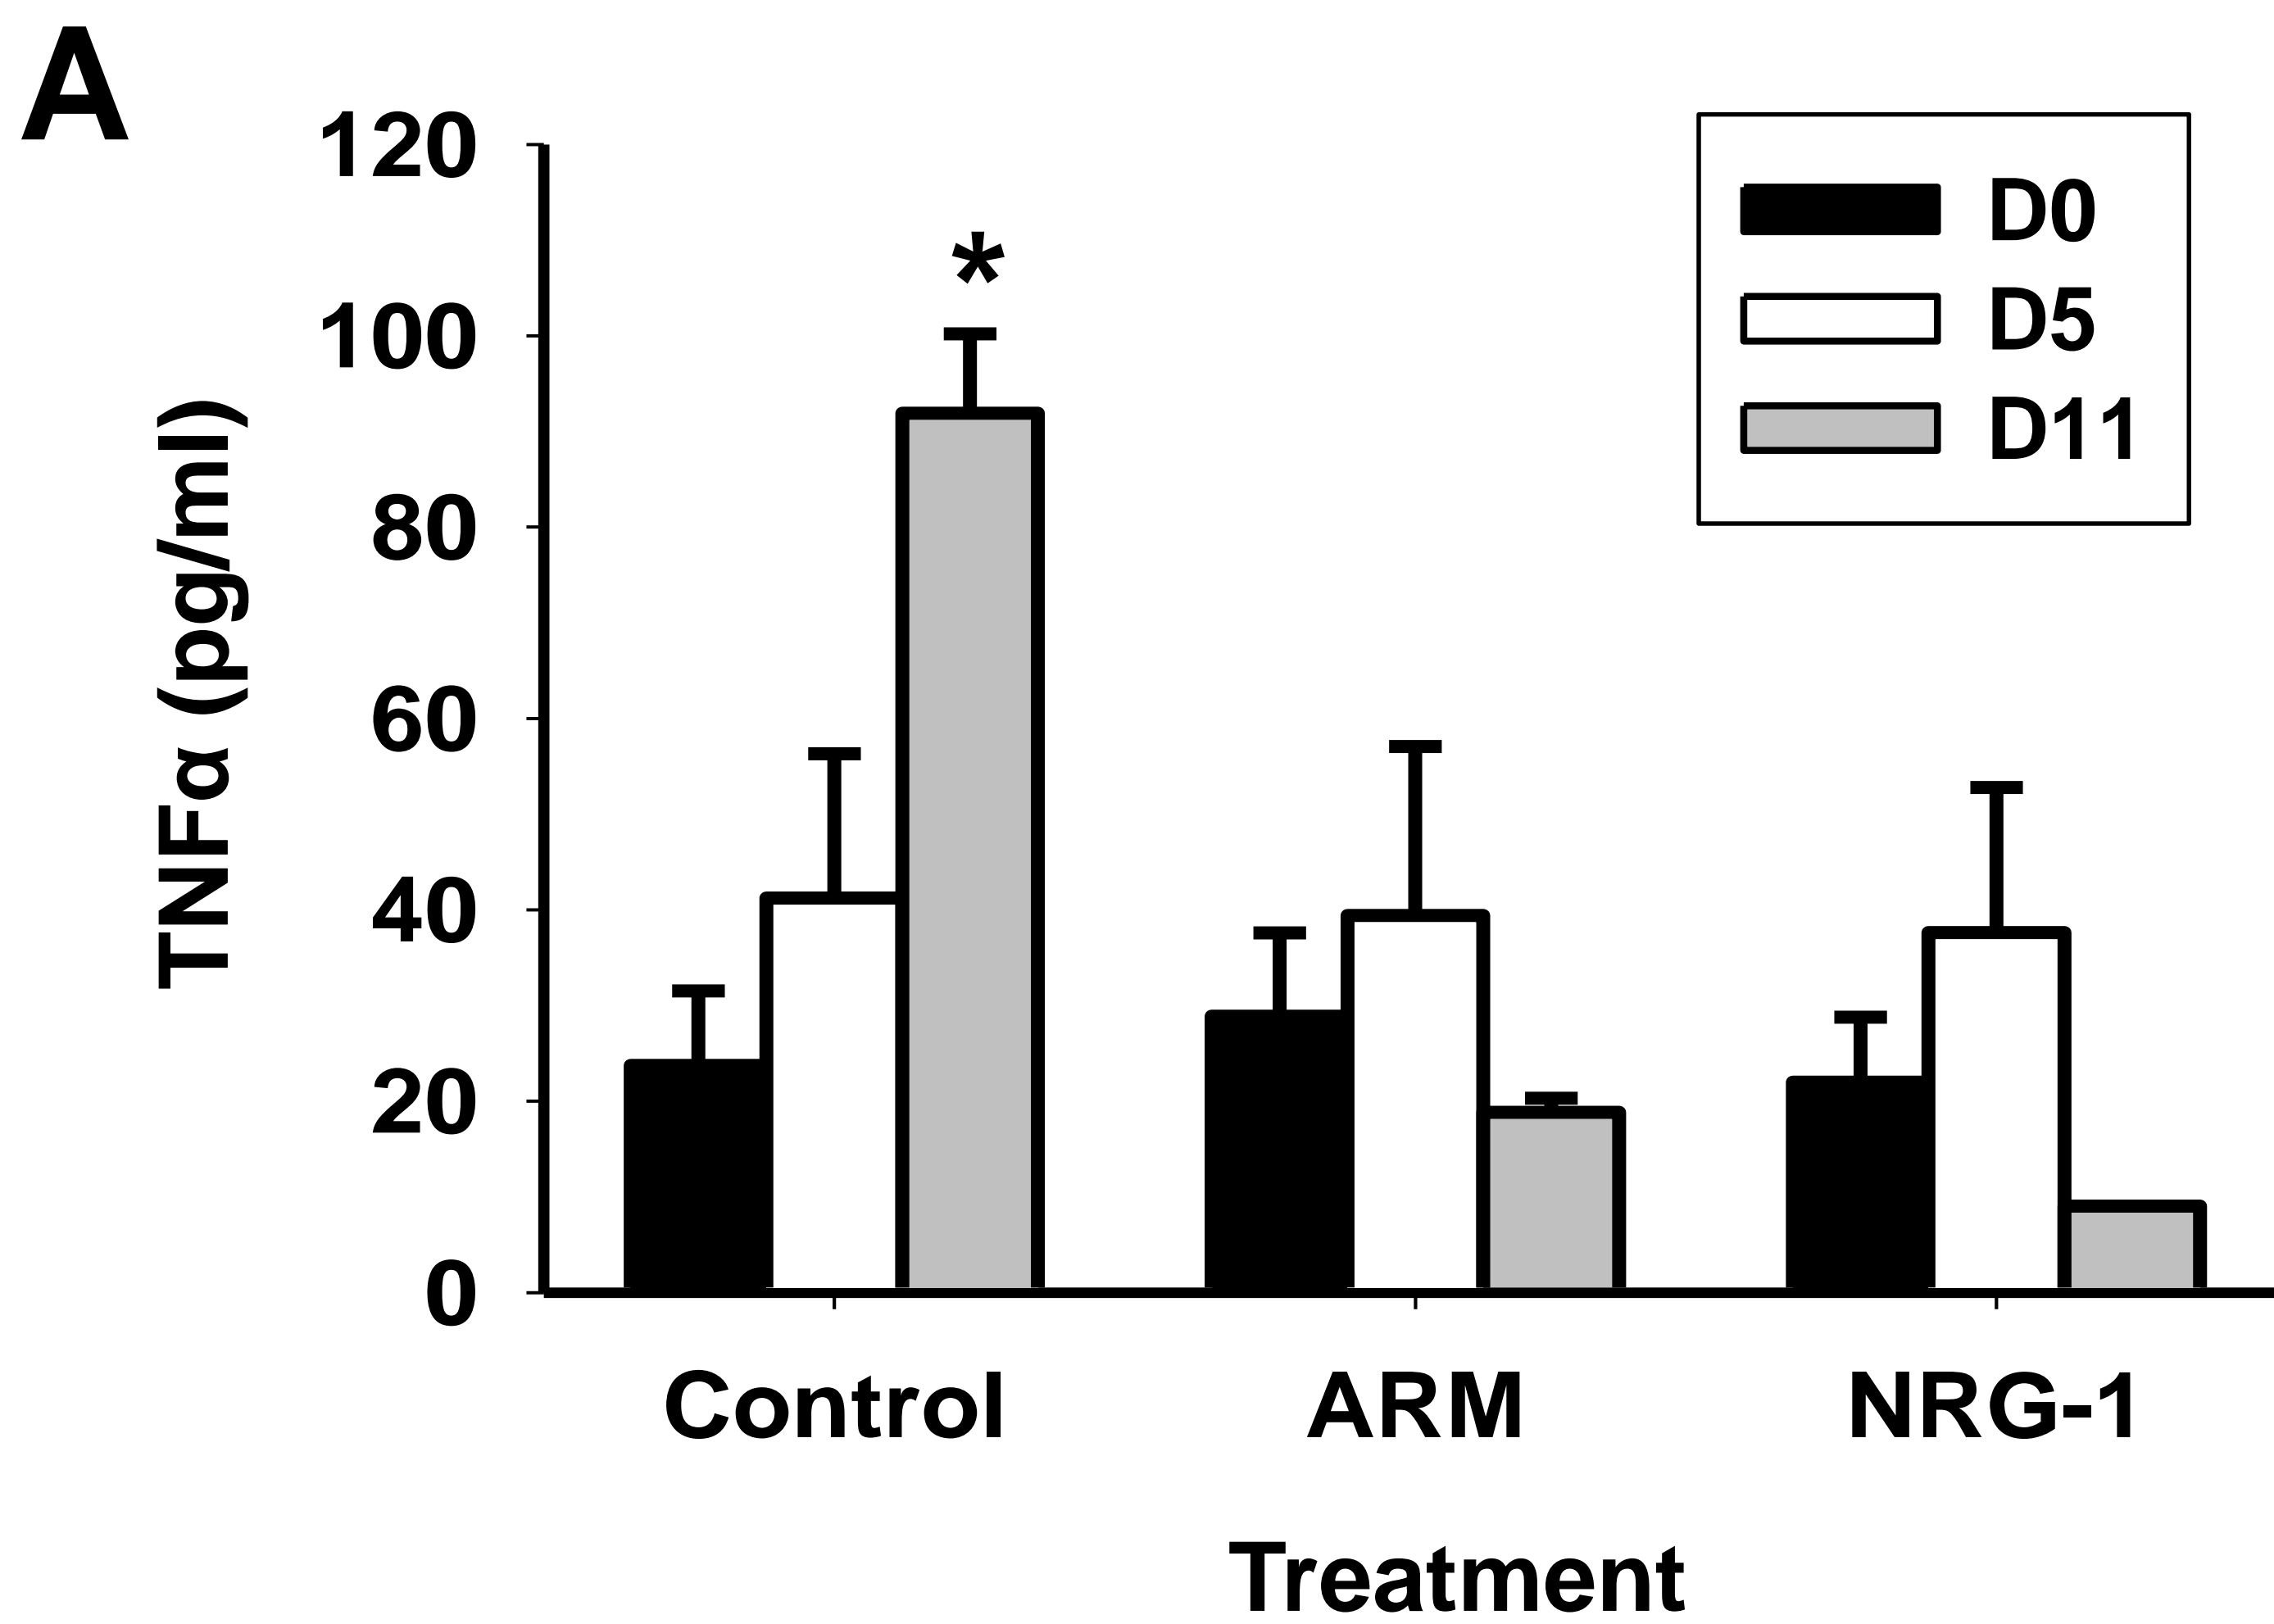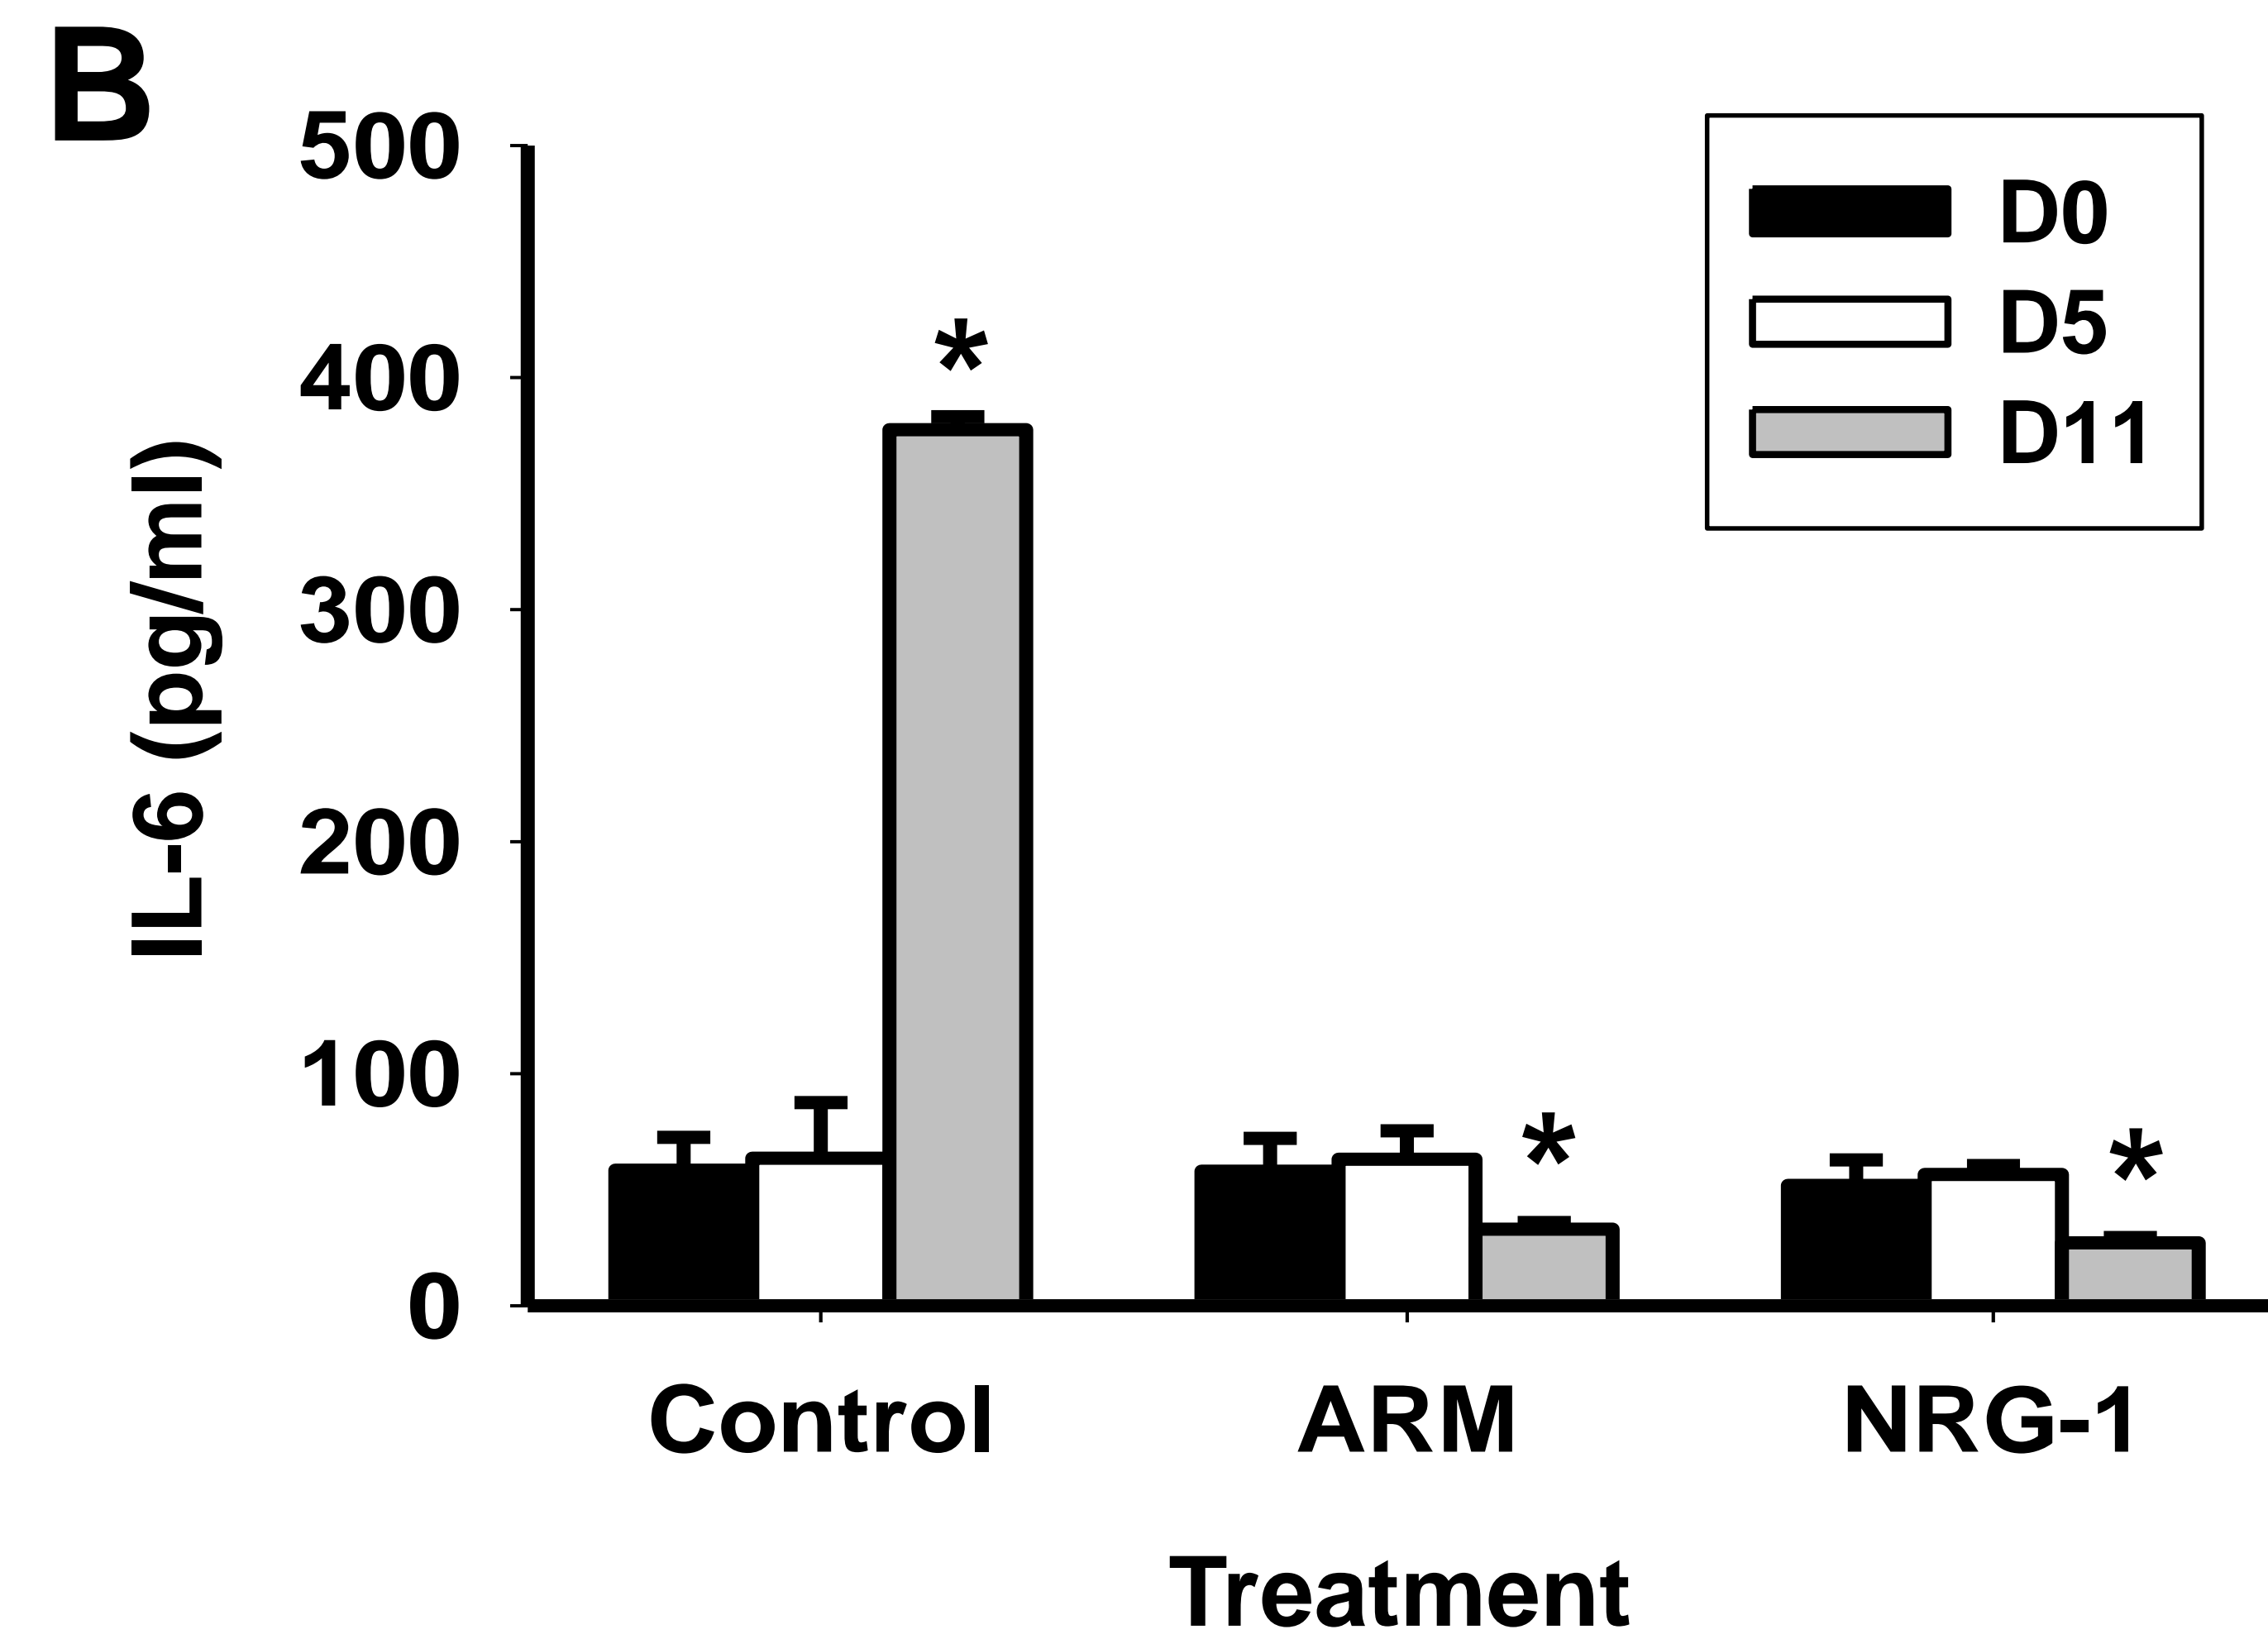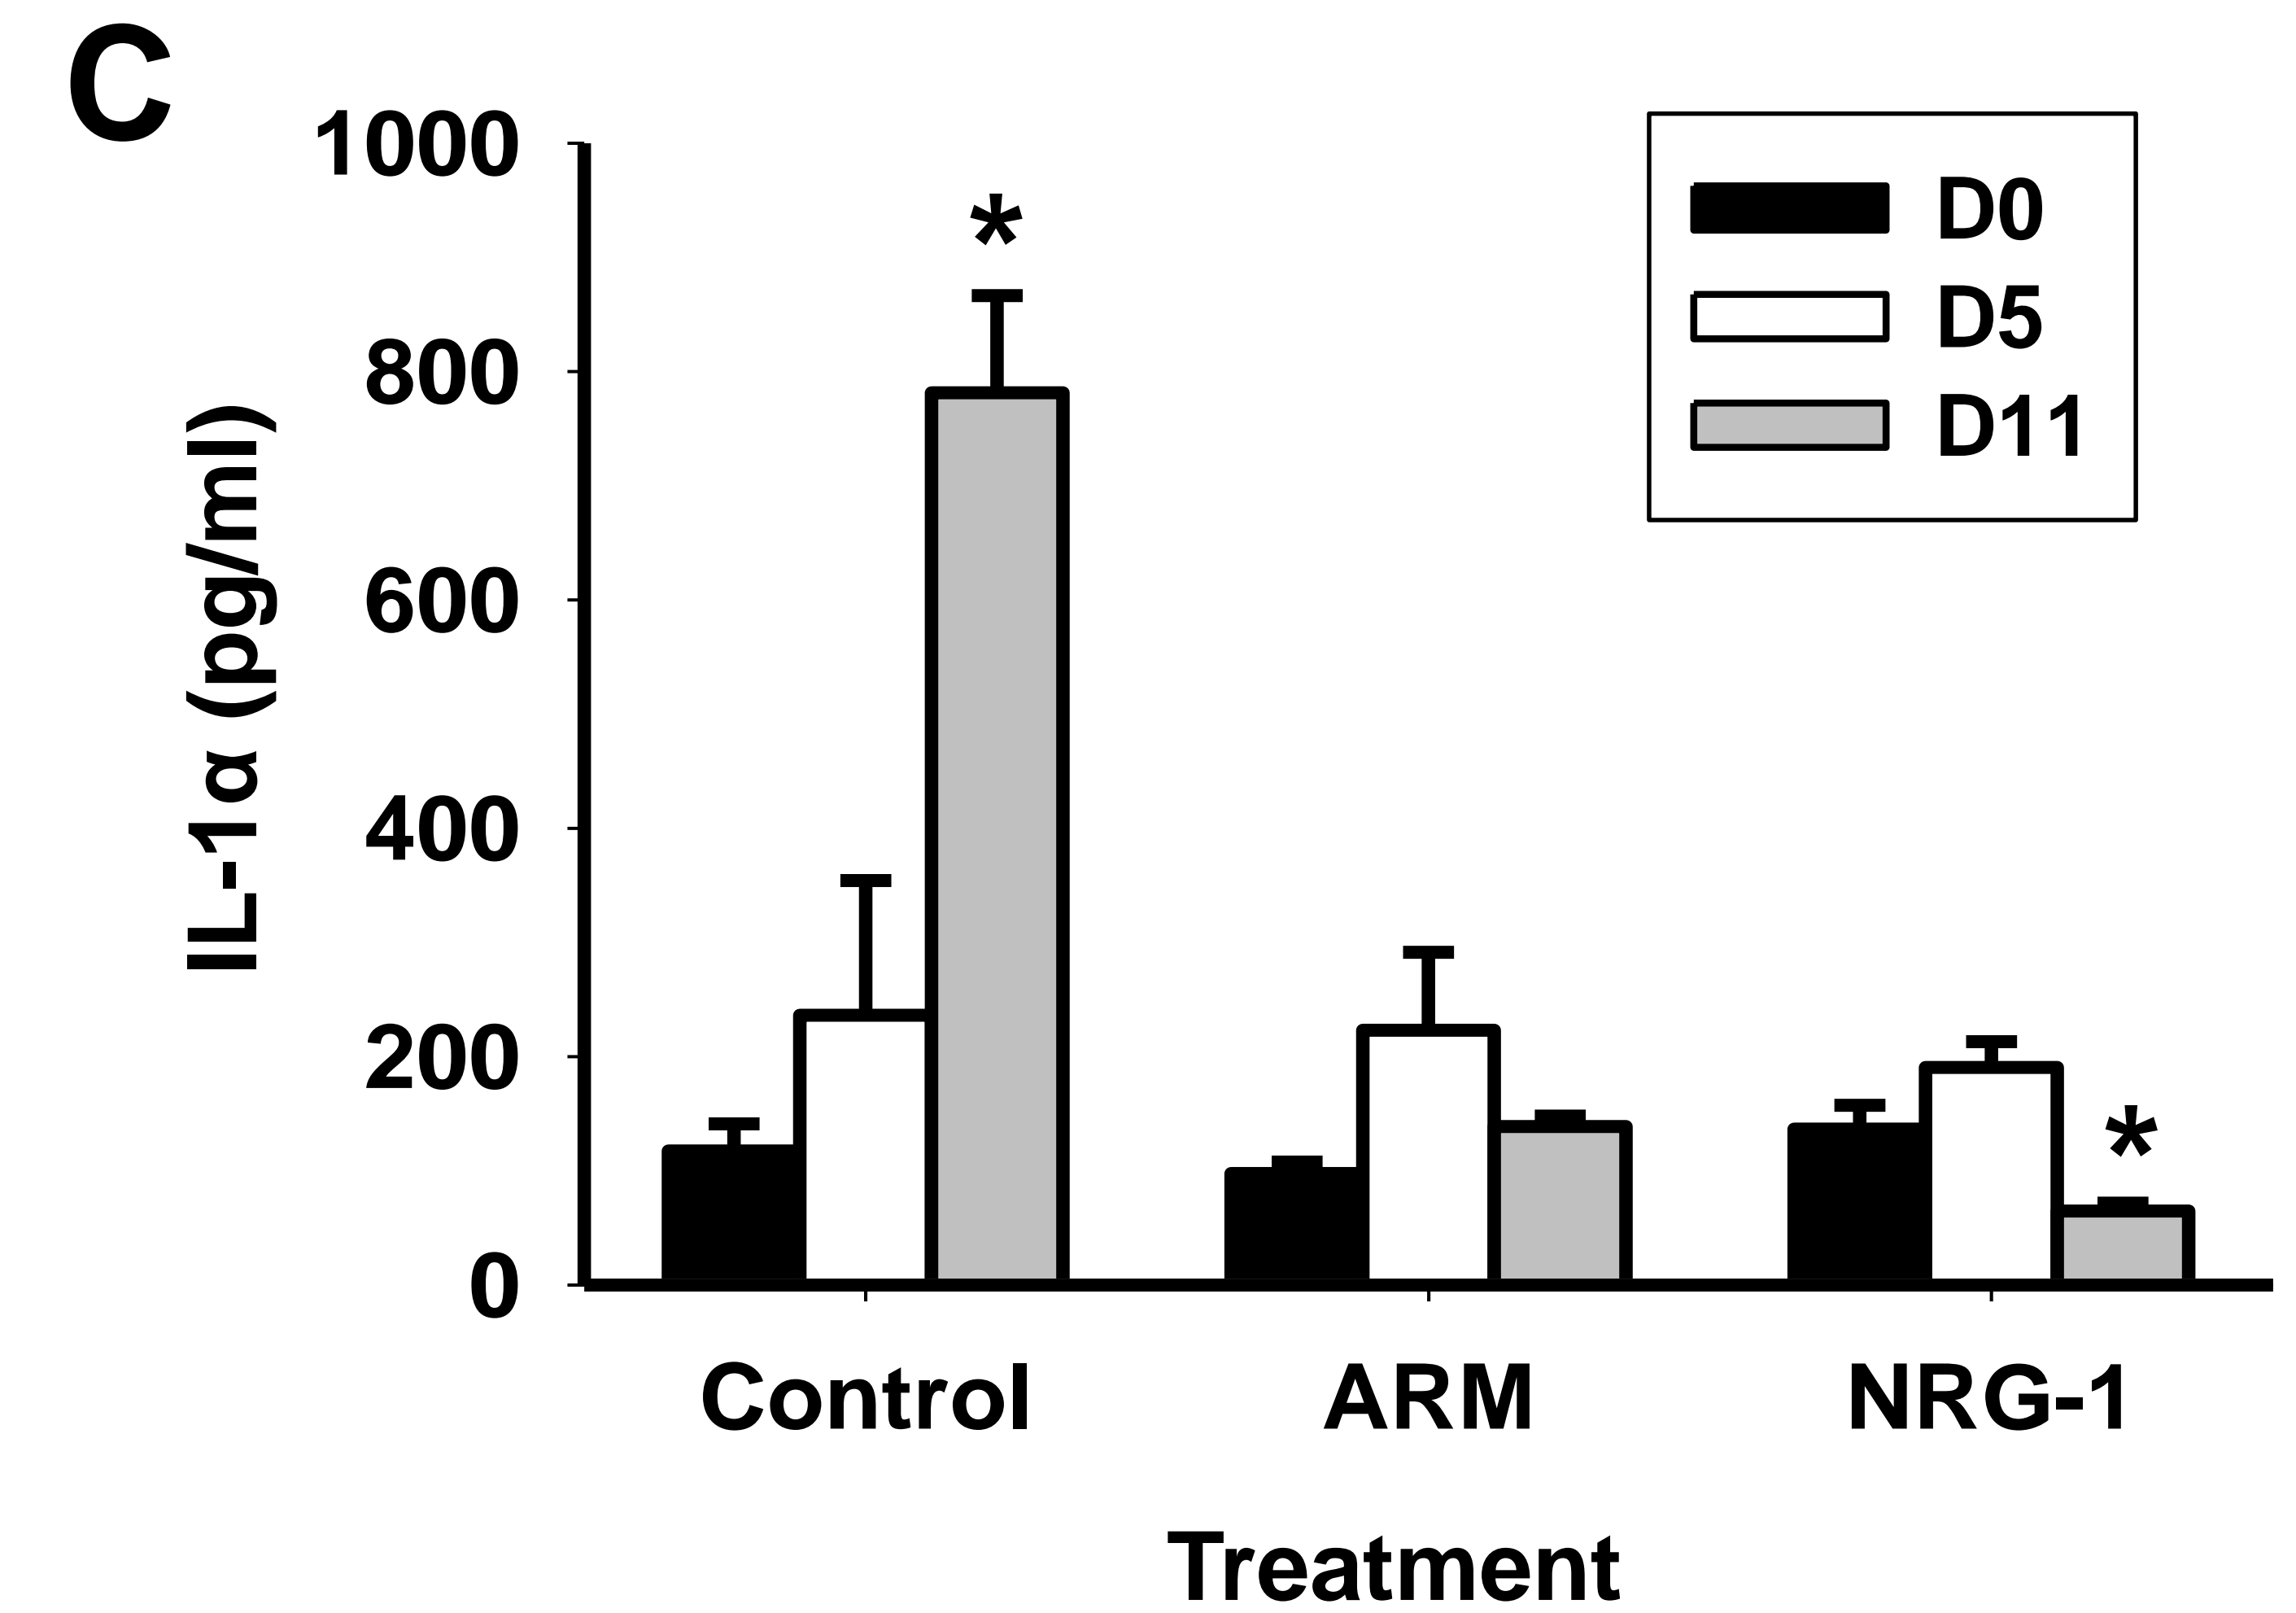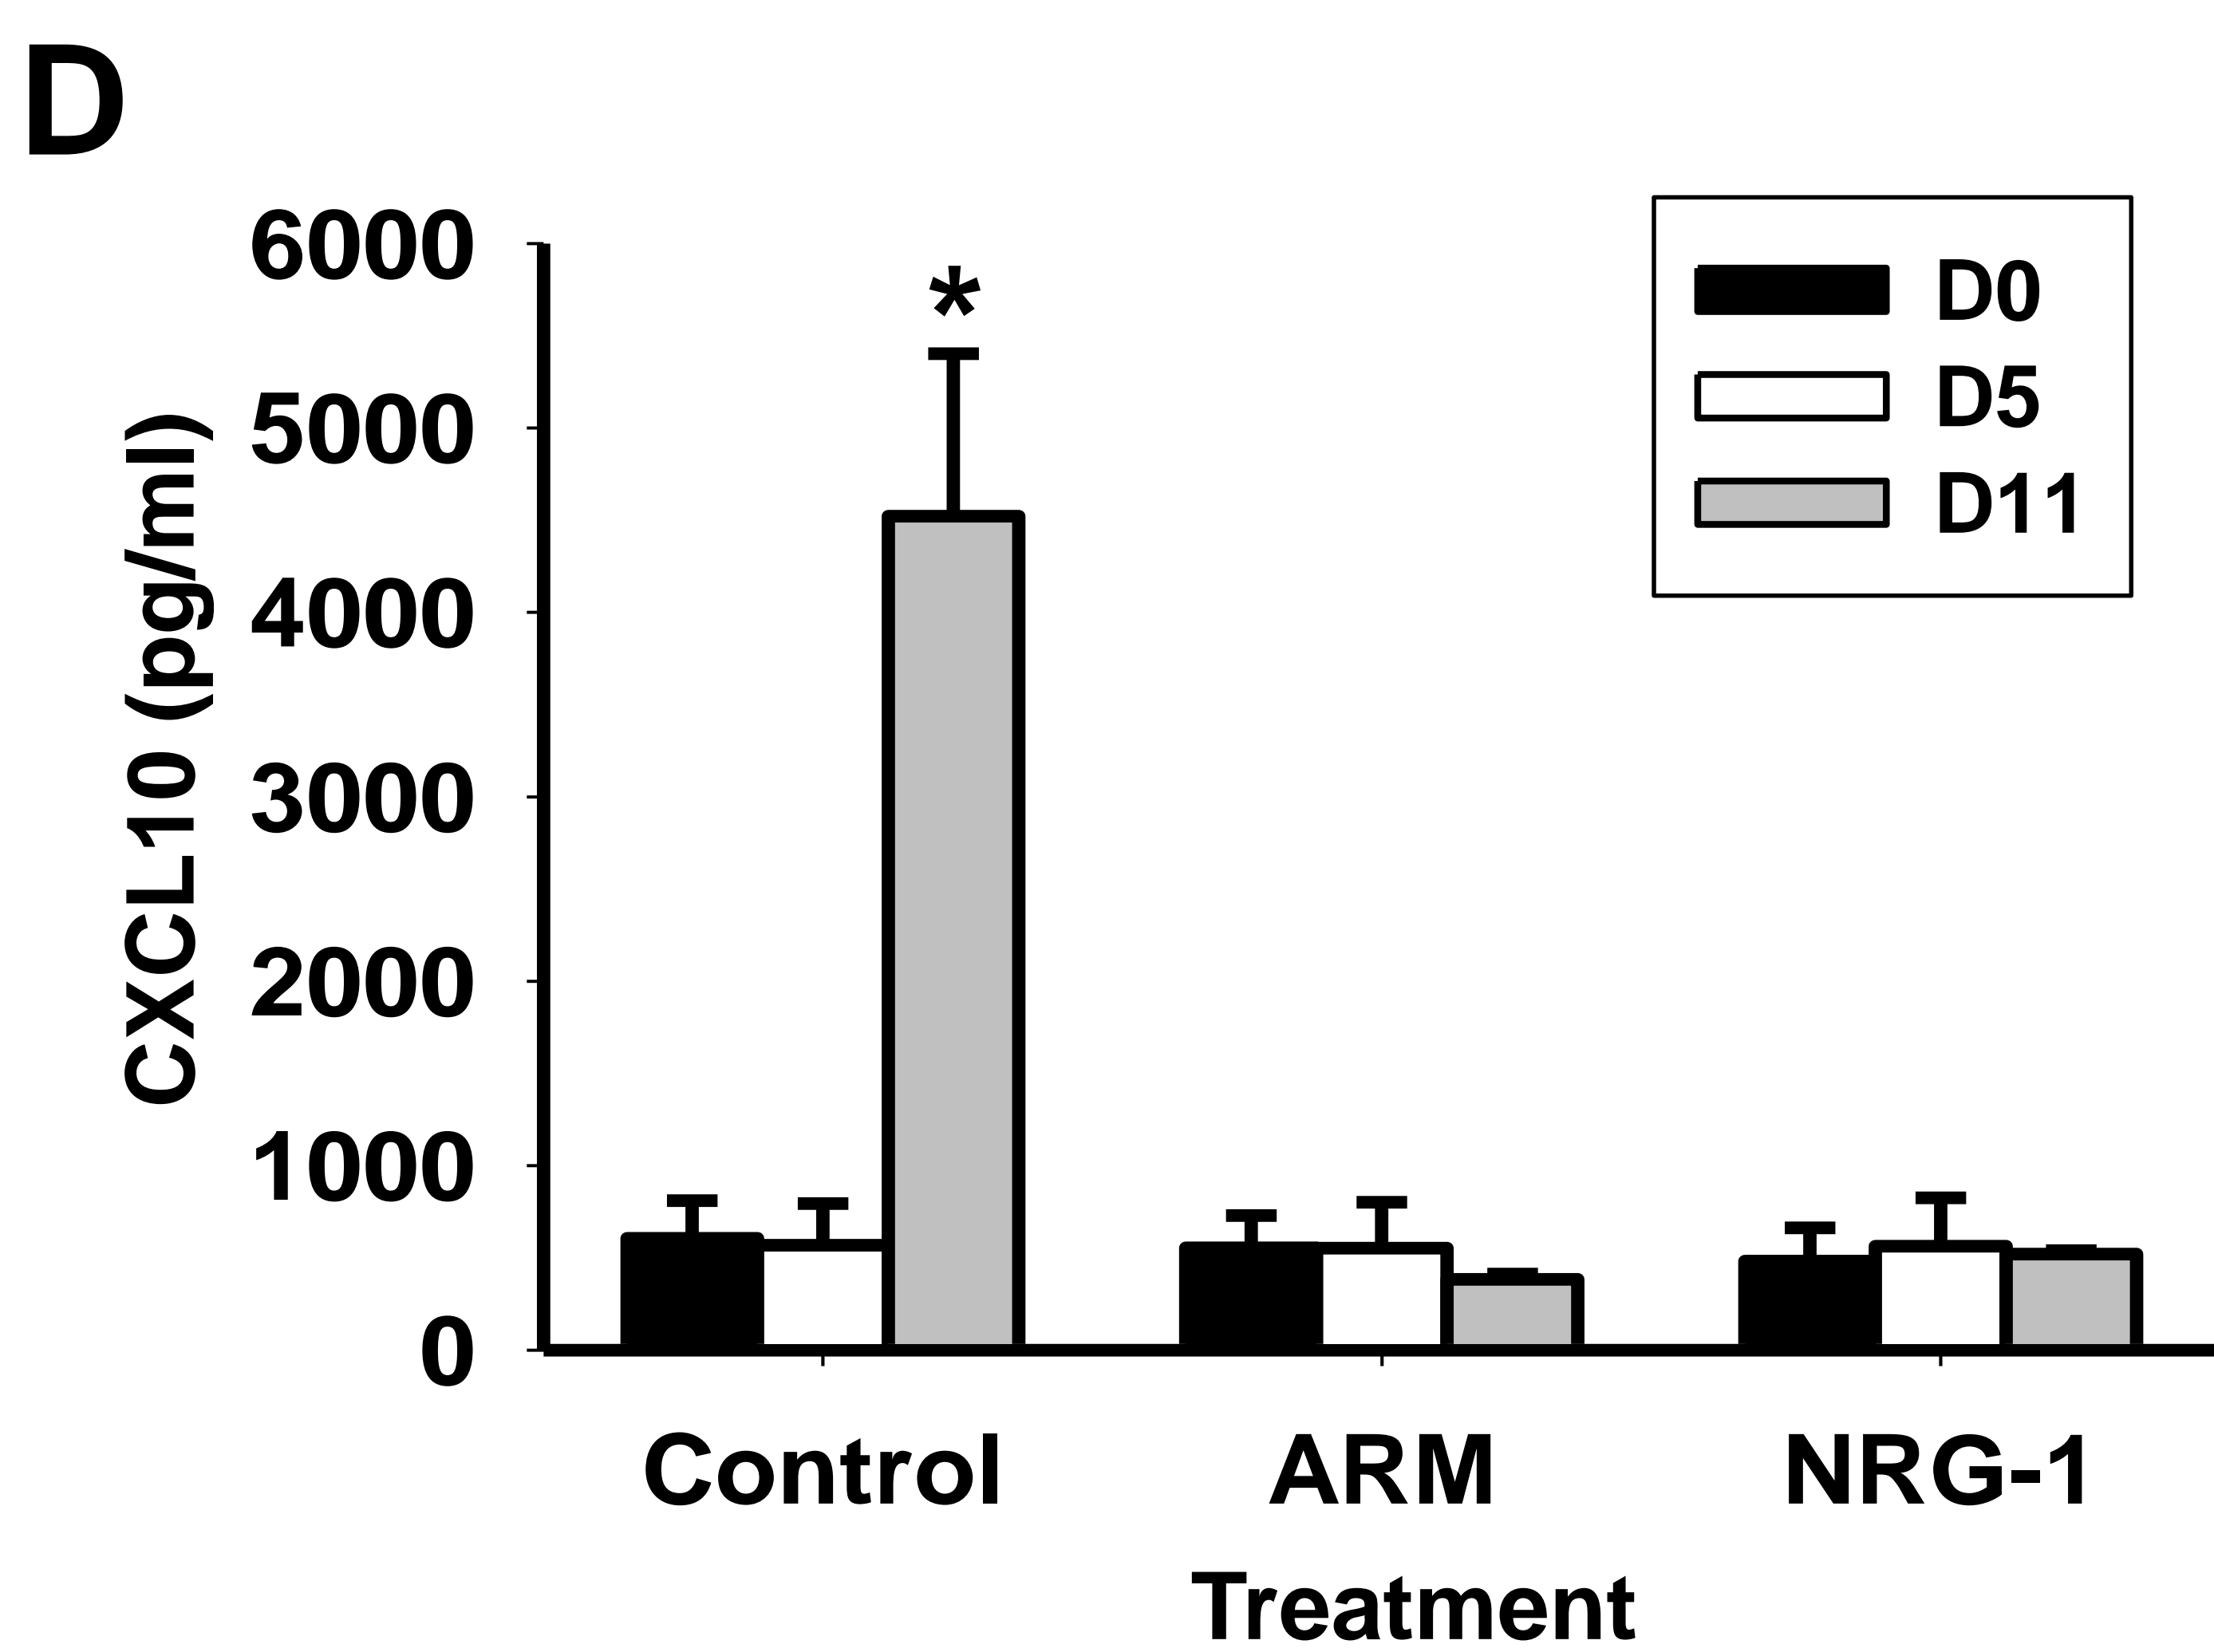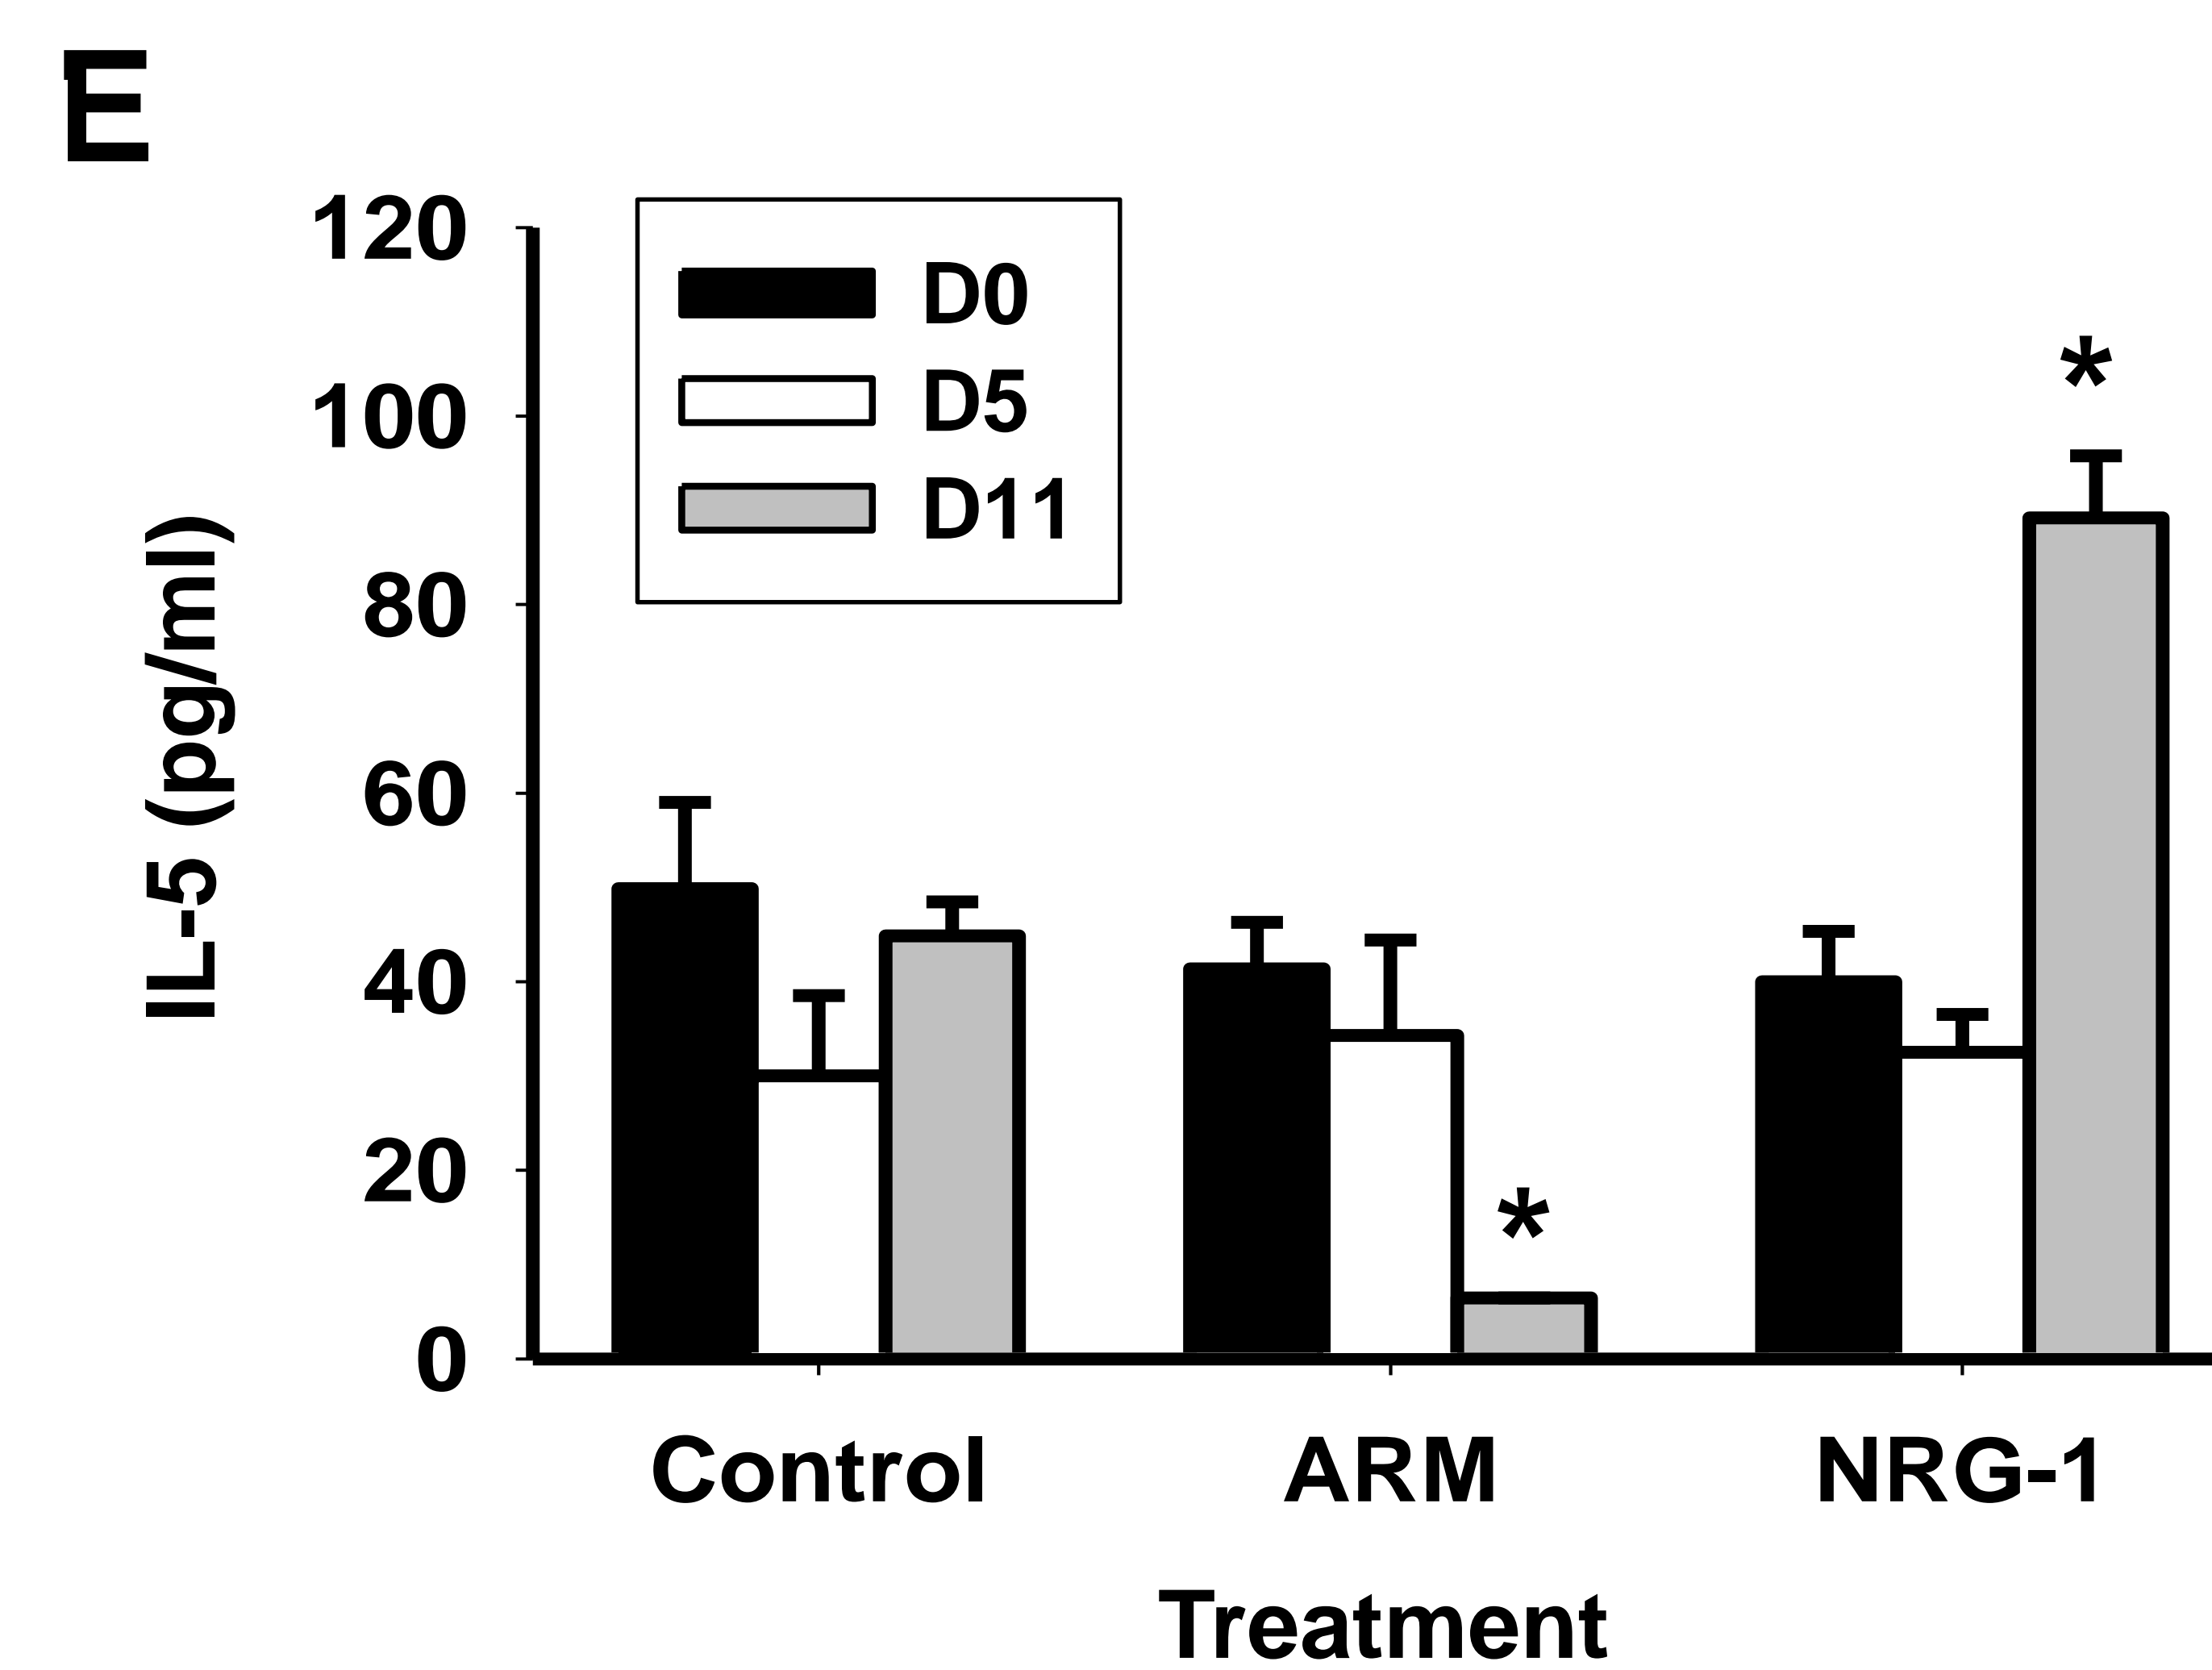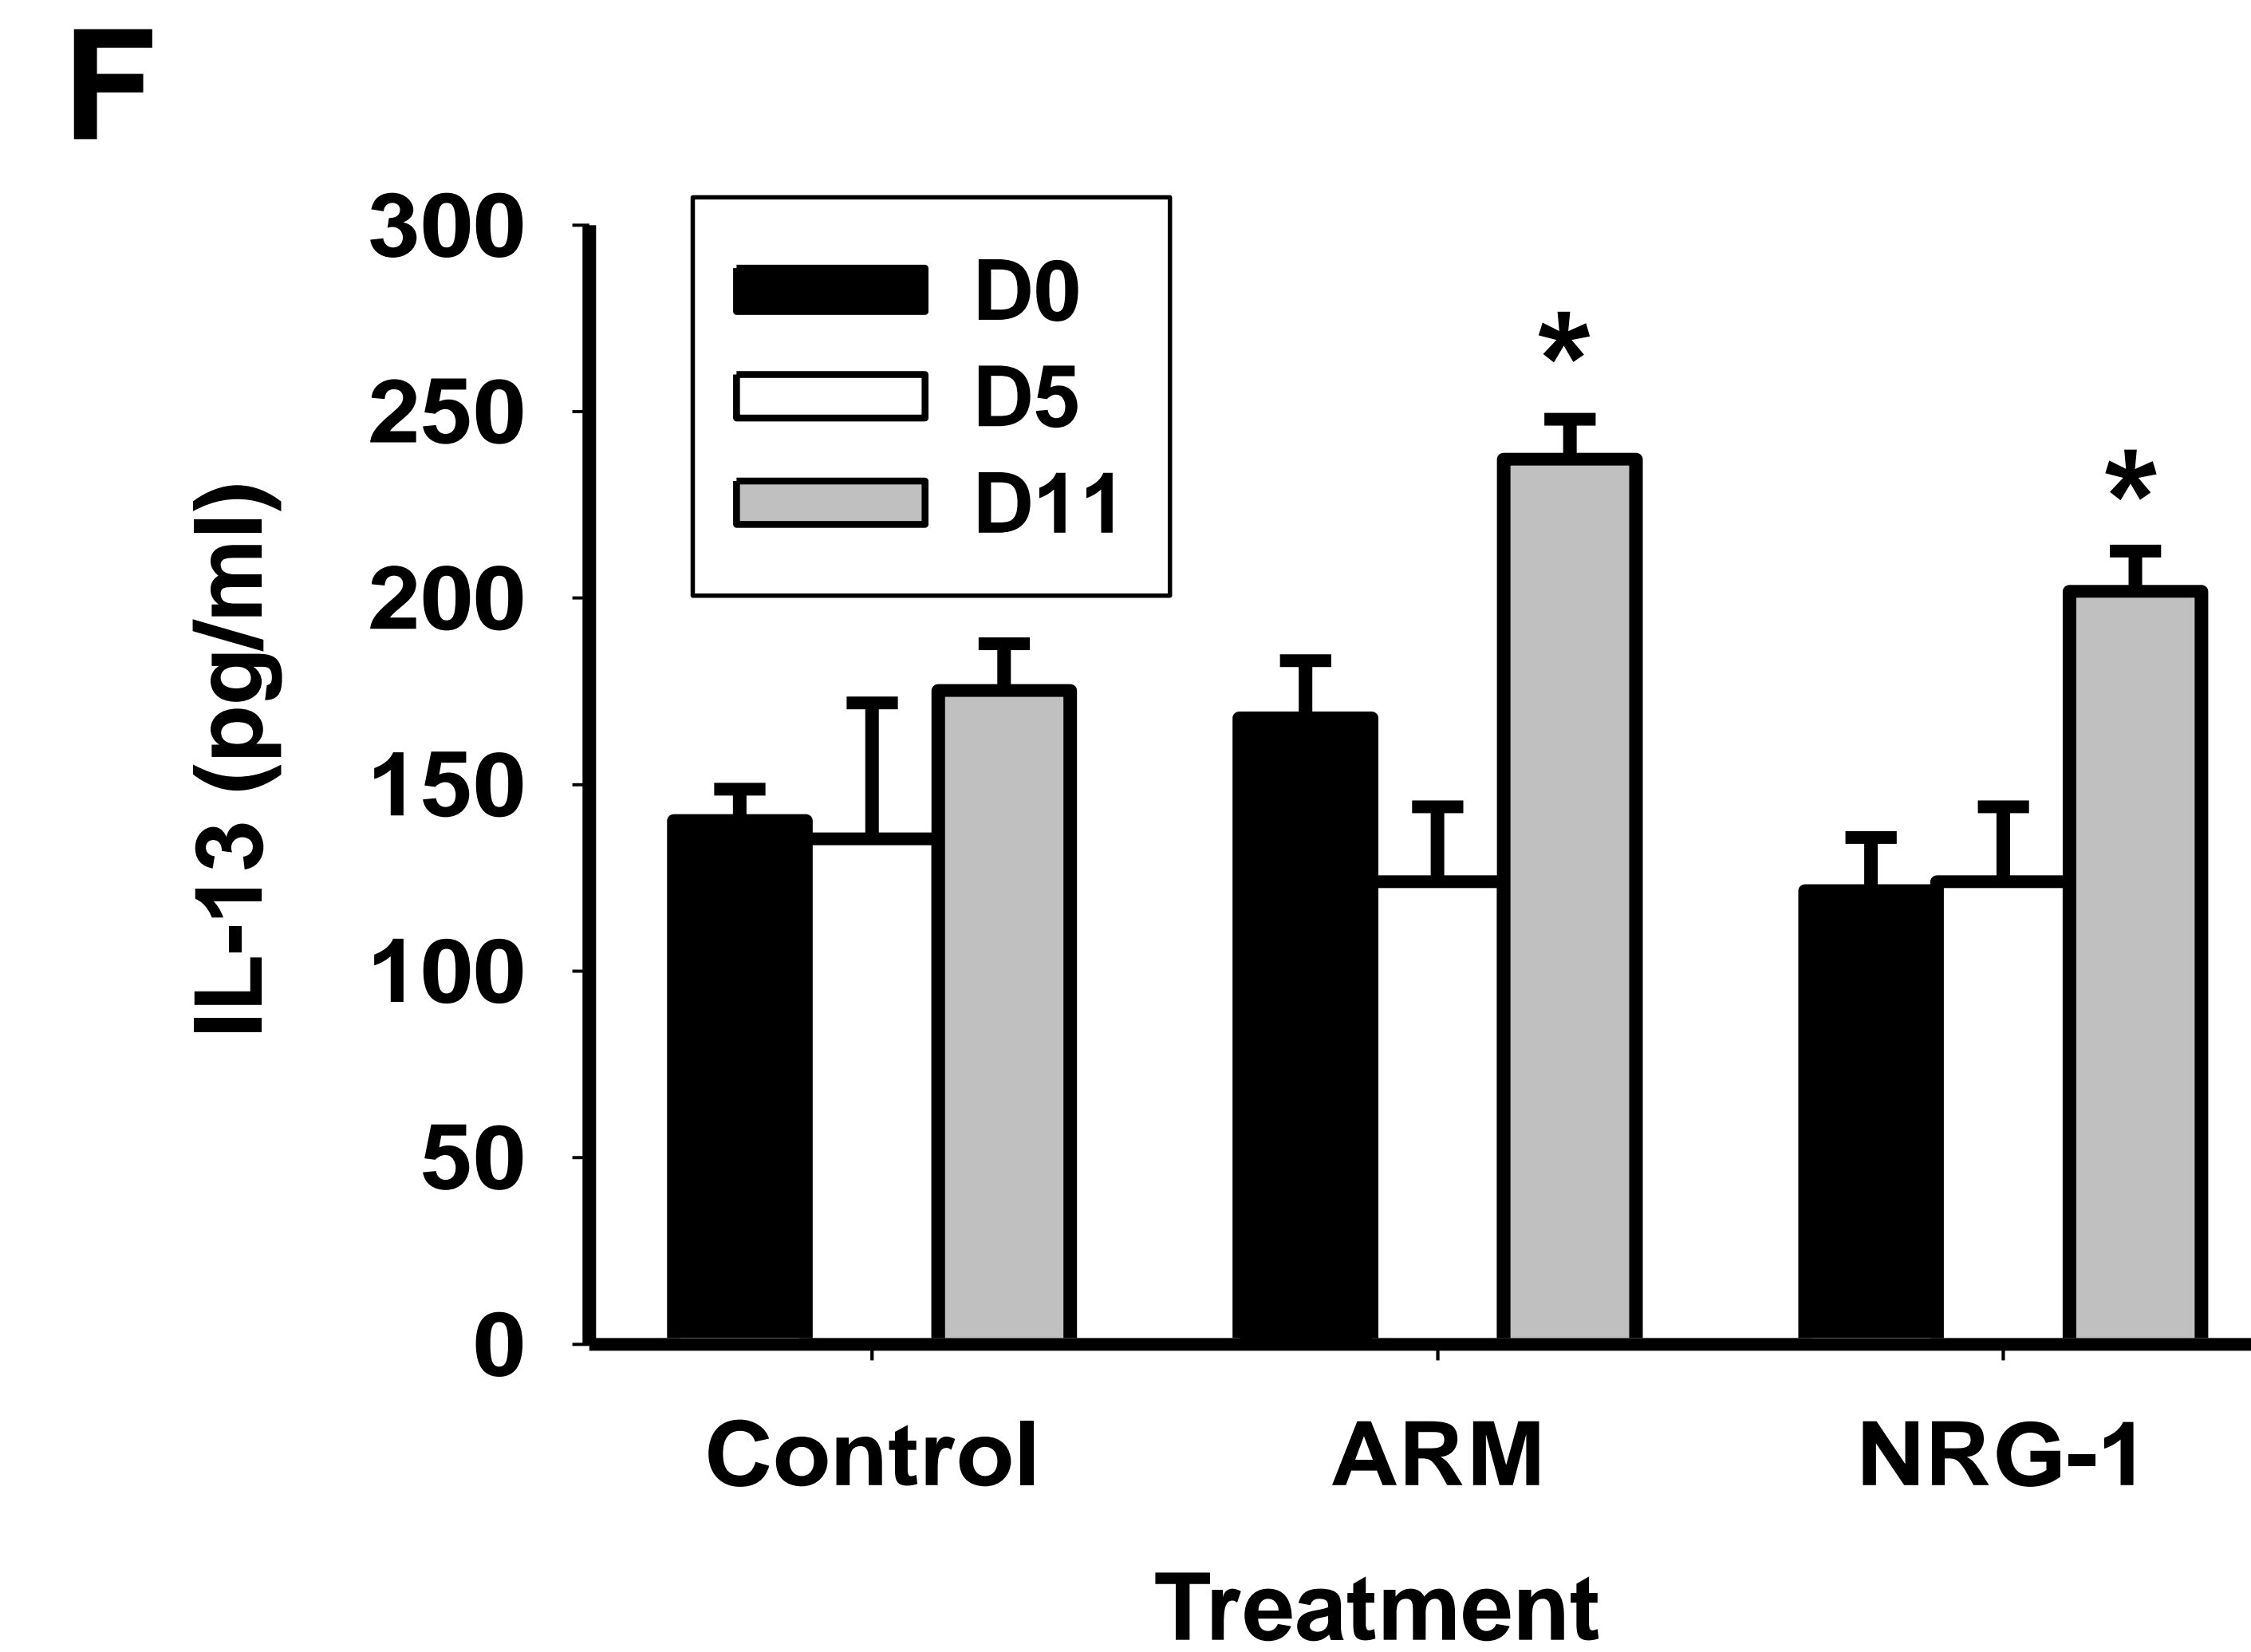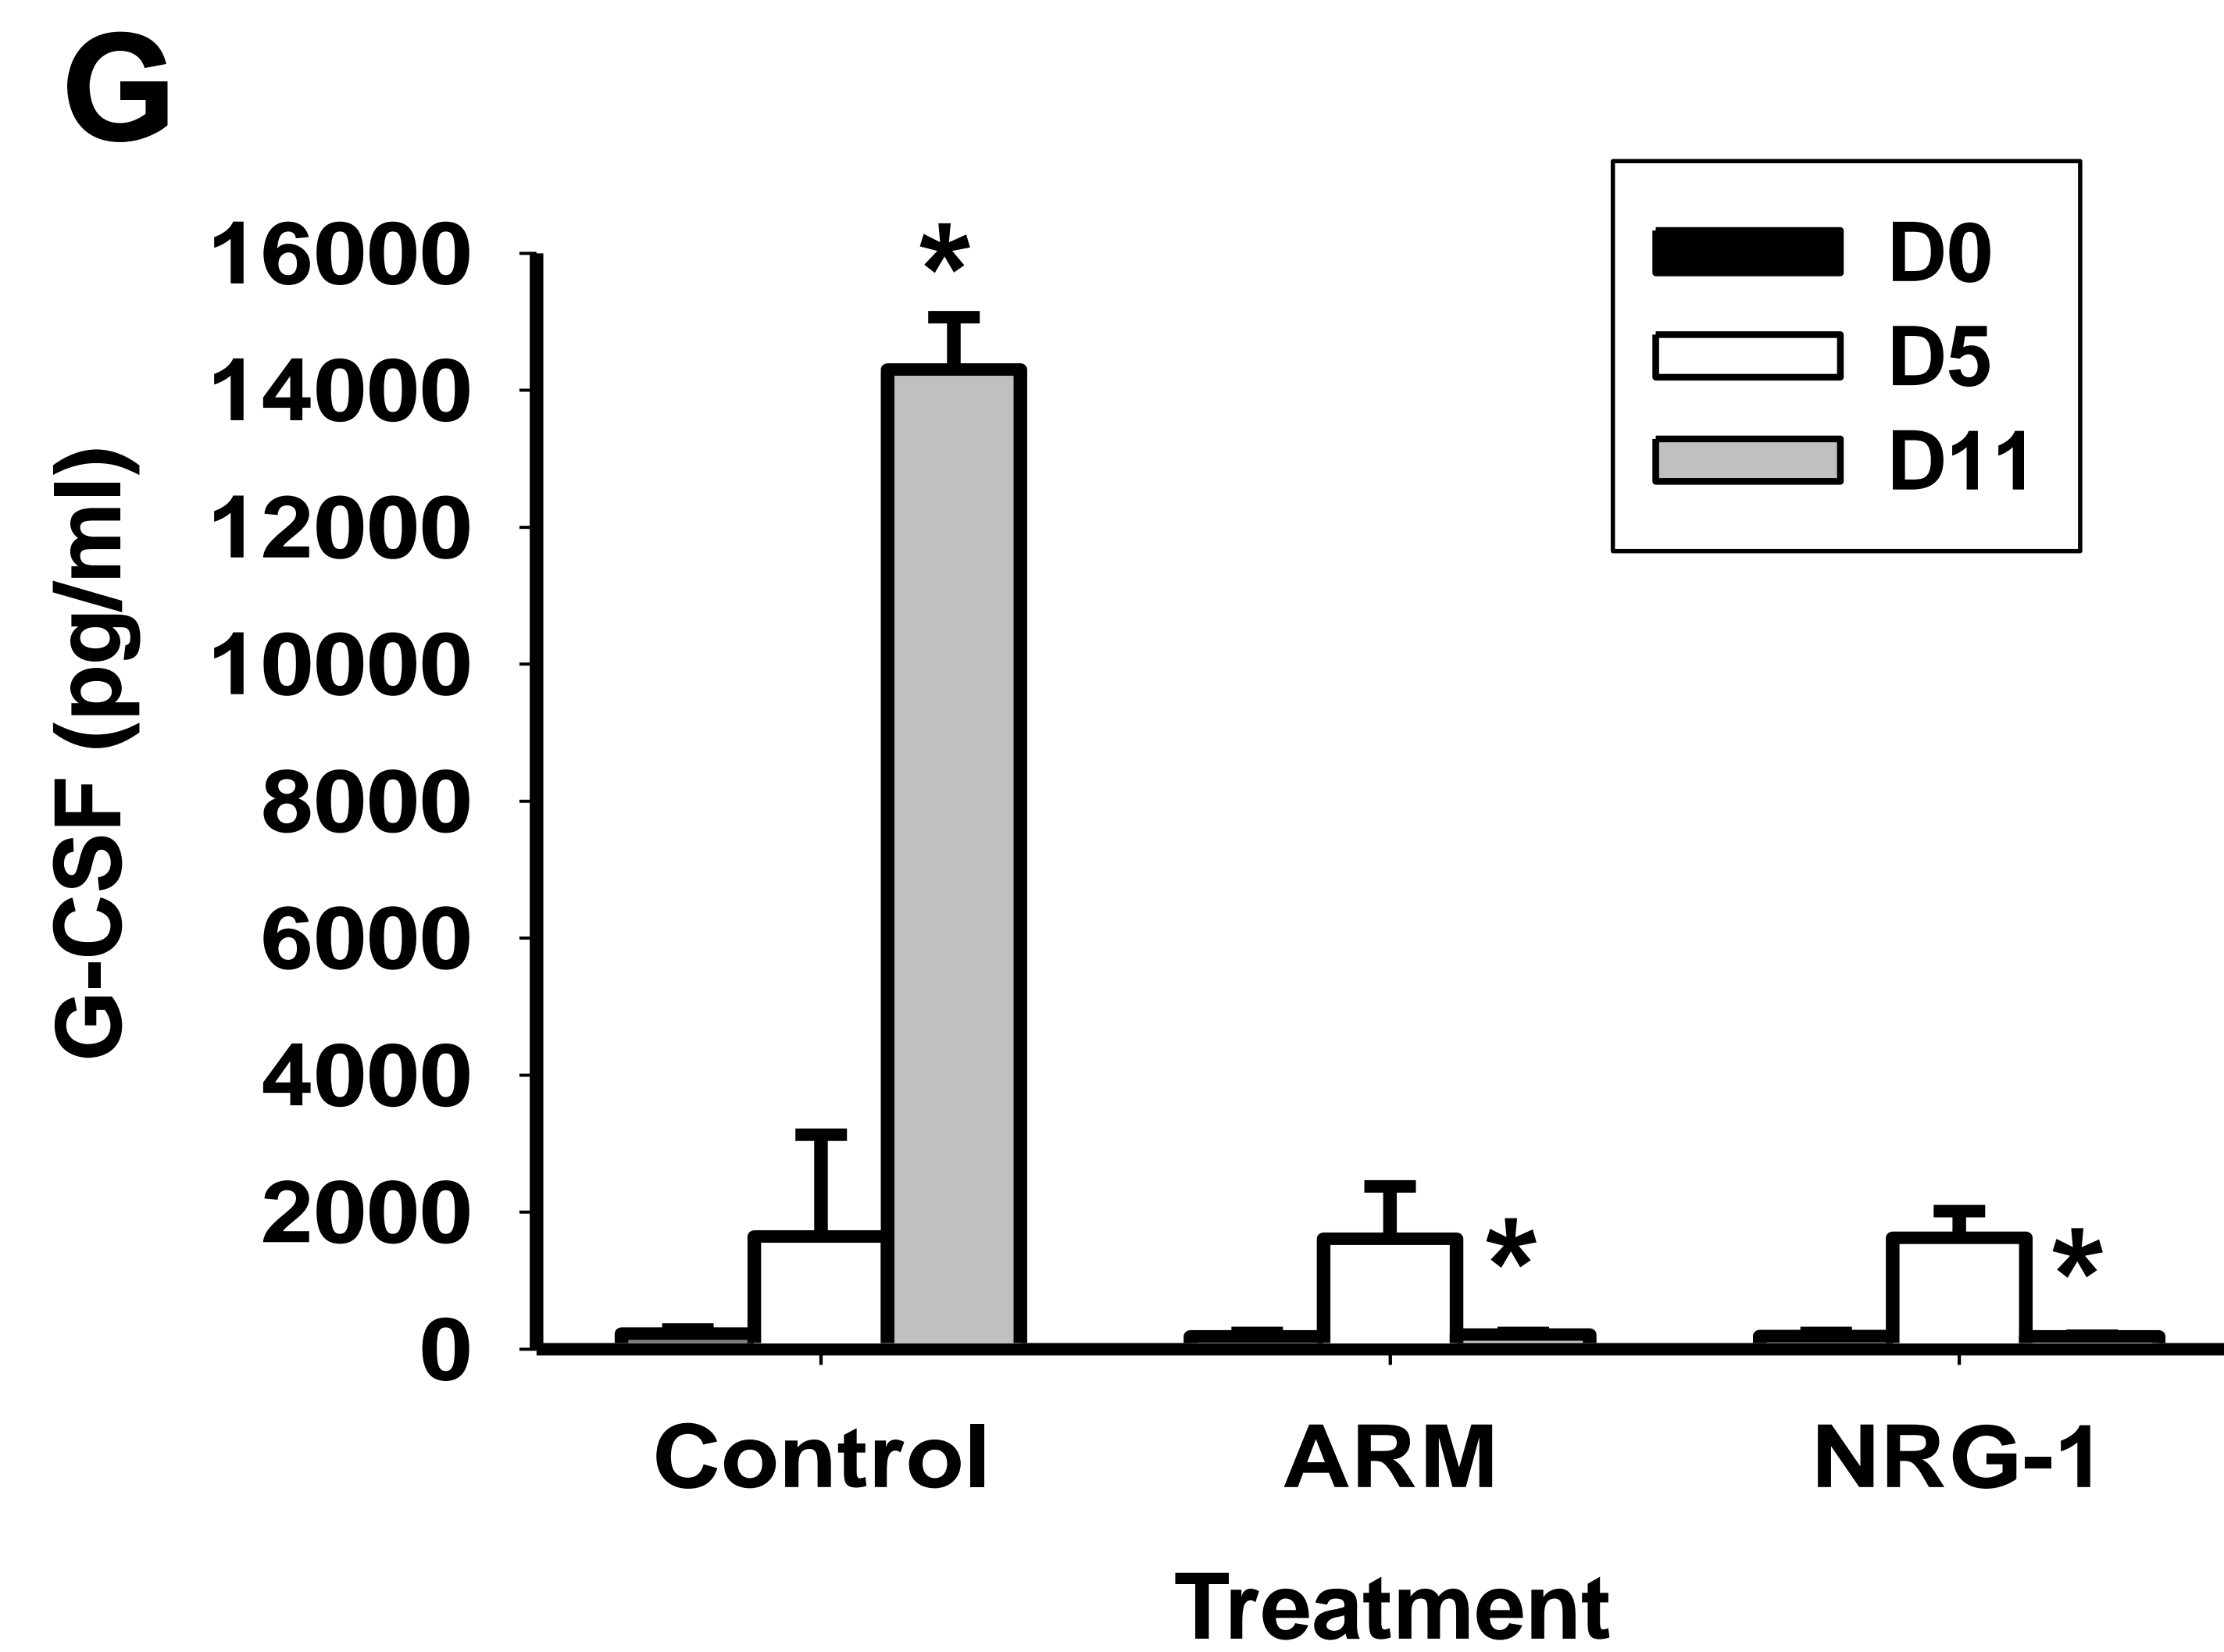

Supplement: MOESM4 [file 9600602]
